# Supplementary material for: A freestanding nitrogen-doped MXene/graphene cathode for high-performance Li–S batteries
Source: Royal Society of Chemistry journal article supplement (doi:10.1039/d2na00072e), 2022-01-01
Supplement: d2na00072e1.pdf [file d2na00072e1.pdf]

## Supplementary Material

for

### Freestanding Nitrogen-doped MXene/Graphene cathode for high-performance Li-S batteries

*Luo yuanzheng<sup>a</sup>, Ye zhicheng<sup>a</sup>, Mo Lianghao<sup>a</sup>, Li buyin<sup>\*b</sup>, Li shufa<sup>\*a</sup>*

a. School of Electronic Information Engineering, Guangdong Ocean University

b. School of Optical and Electronic Information, Huazhong University of Science and Technology

---

\* Corresponding author (Li buyin) at: Key Laboratory of Electronic Information Functional Material of Education Ministry, School of Optical and Electronic Information, Huazhong University of Science and Technology. *E-mail address:* libuyin@hust.edu.cn (Li buyin), luoyz@gdou.edu.cn (Luo Yuanzheng), wanyq20@lzu.edu.cn (Wan Youqi), [yezhicheng@stu.gdou.edu.cn](mailto:yezhicheng@stu.gdou.edu.cn) (Ye zhicheng), [lishufa@gdou.edu.cn](mailto:lishufa@gdou.edu.cn) (Li shufa)

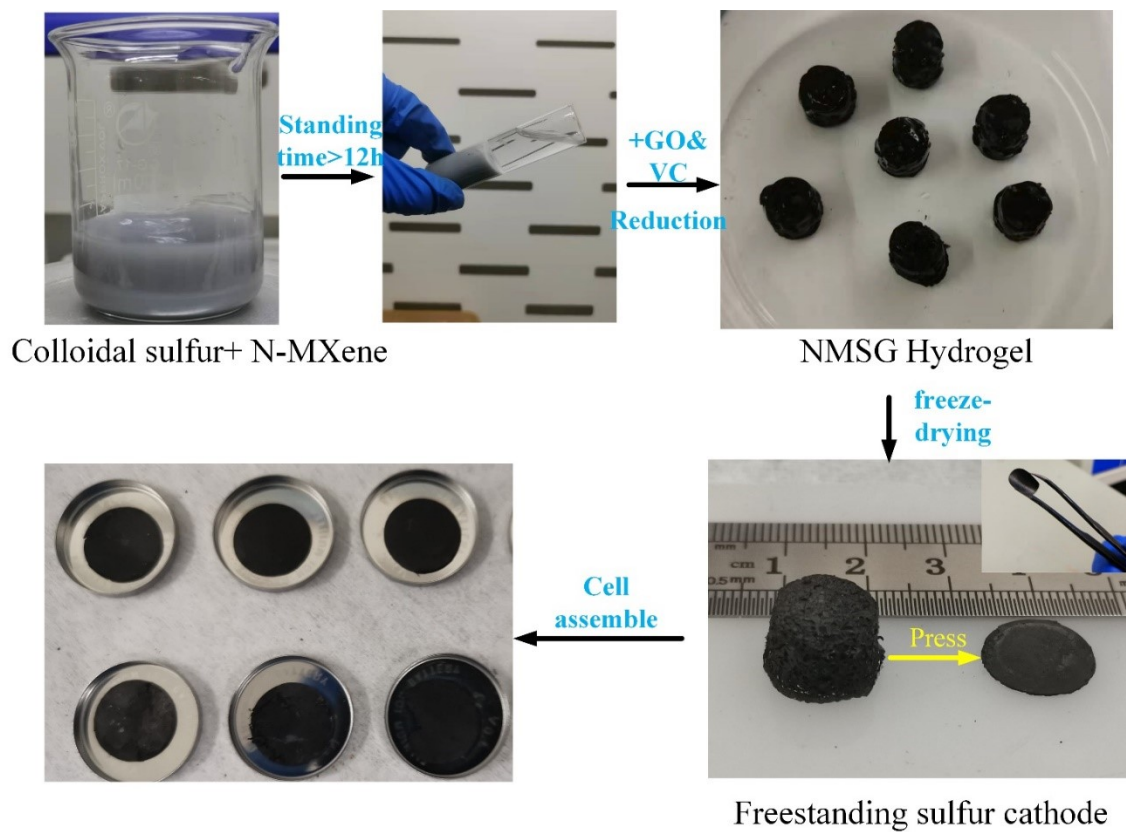

Fig.S1 Photos of the freestanding NMSG electrode synthesis process

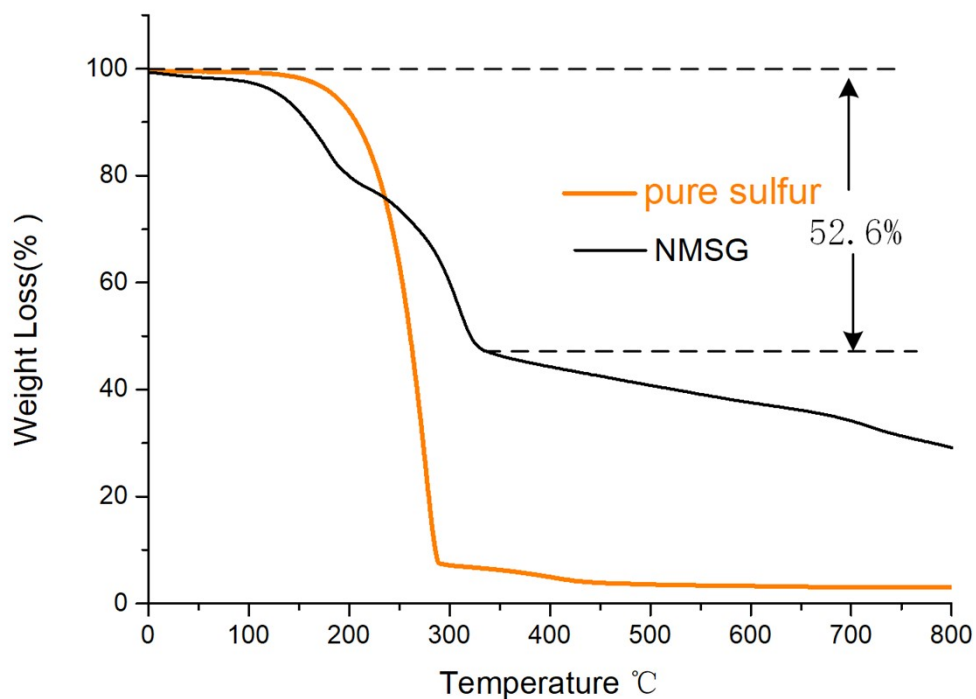

Fig.S2 TGA curve of the NMSG monolith and pure sulfur

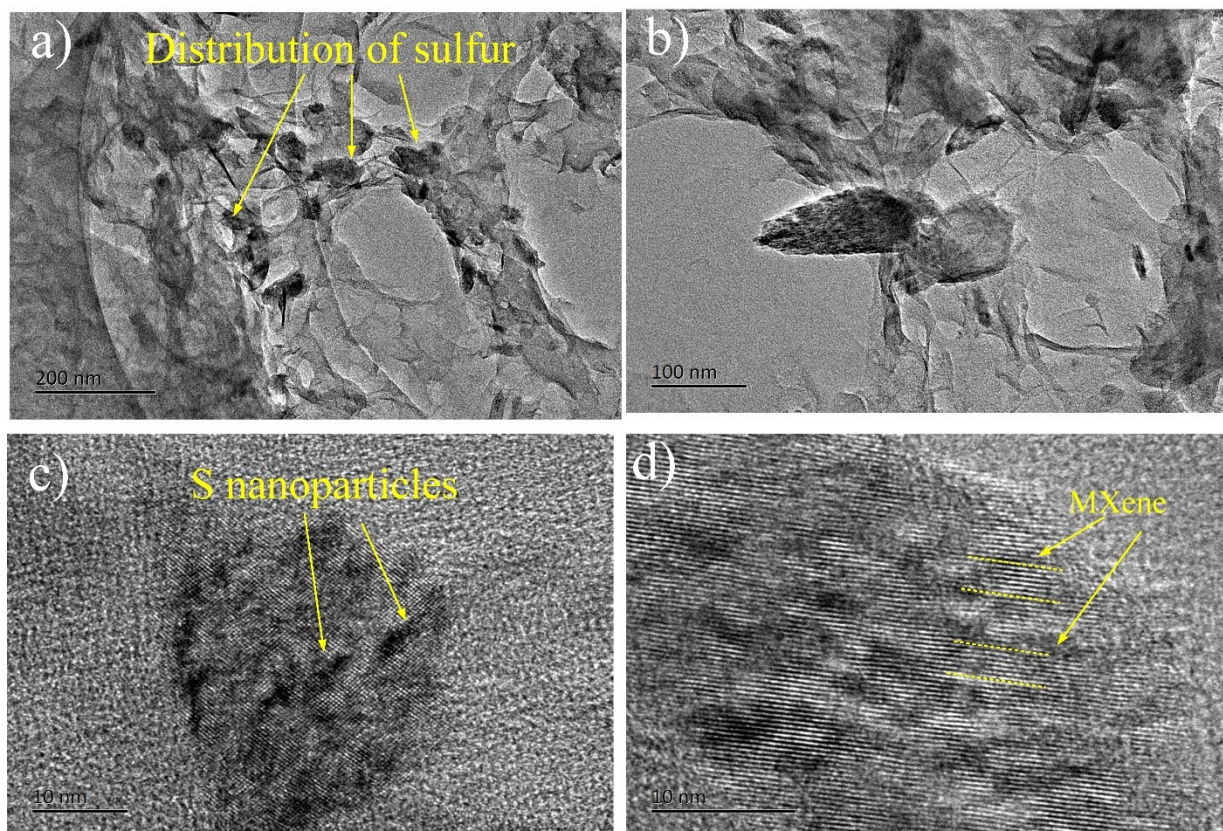

**Fig.S3** HTEM images of NMSG at different magnifications

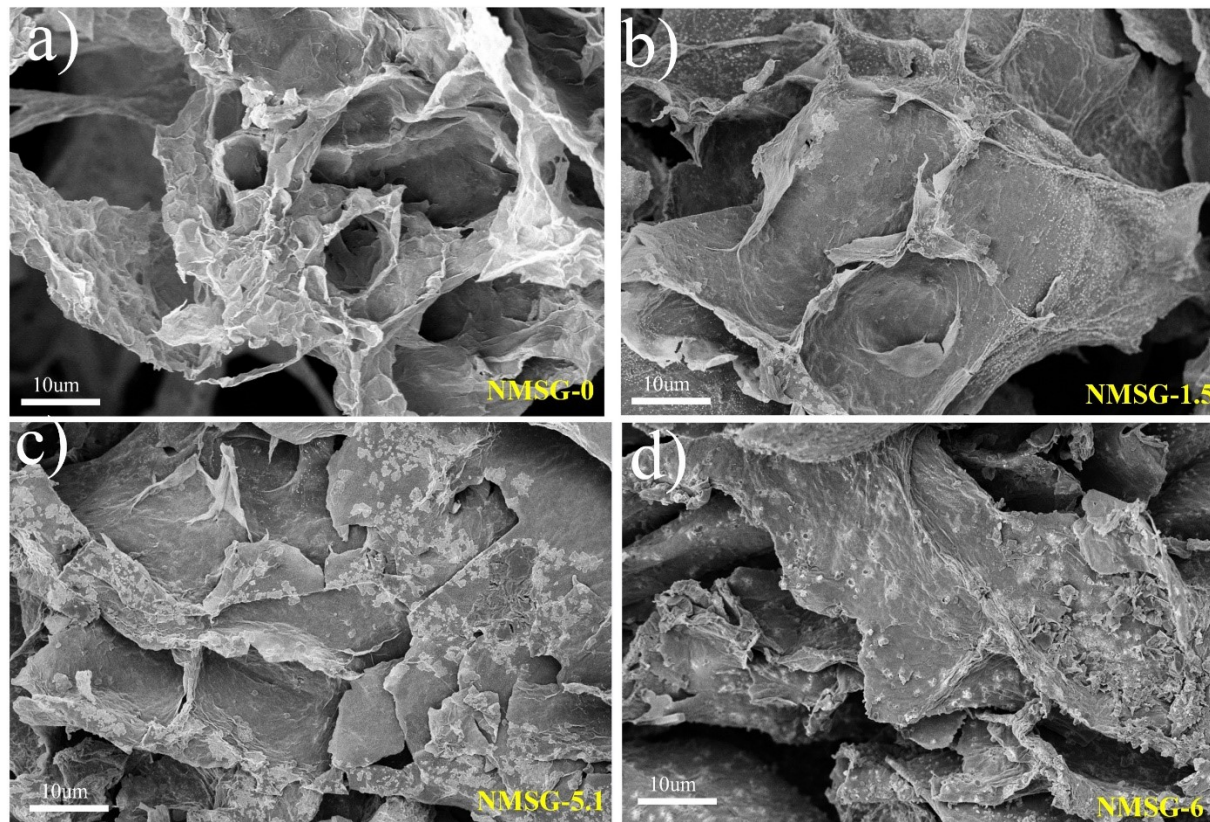

**Fig.S4** SEM images of the NMSG composites with different areal sulfur loadings

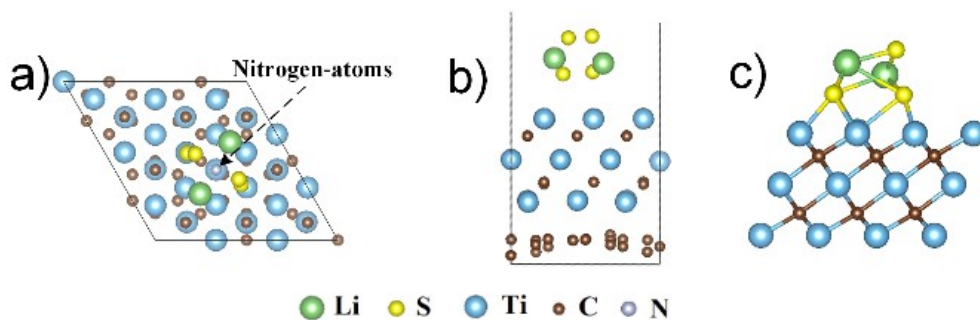

**Fig.S5** a) The slab model of  $\text{Li}_2\text{S}_4$  on the N- $\text{Ti}_3\text{C}_2$ /graphene surfaces b) Side view of a slab model; The first principles calculations are performed using DFT in conjunction with projector augmented wave (PAW). The electron structure was calculated using the Vienna Ab initio Simulation Package (VASP)<sup>[1]</sup>, and the interaction between nucleus and electron was described using a projector enhanced wave (PAW) model with perdw-Burke-Ernzerhof (PBE) function<sup>[2]</sup>. Then, the brillouin region of all systems was sampled using monkhorst-pack grids centered on gamma-points, and the k-point sampling method setup of  $3 \times 3 \times 1$  Monkhorst Pack was used for flat plate geometry optimization. The convergence criteria for force and energy are  $0.02 \text{ eV \AA}^{-1}$  and  $10^{-5} \text{ eV}$ , respectively. Fig.S5) depict the slab model and side view of a representative polysulfide  $\text{Li}_2\text{S}_4$  on the surface of N- $\text{Ti}_3\text{C}_2$ /graphene heterojunction.

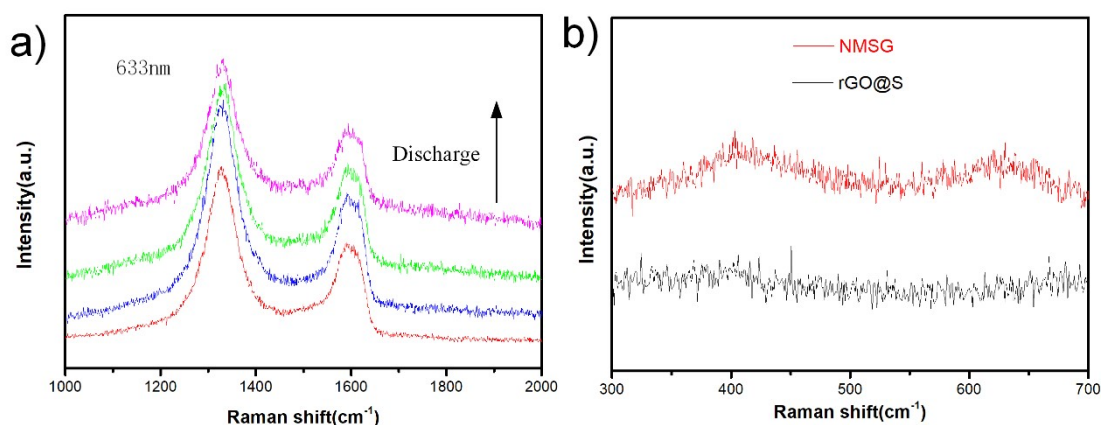

**Fig.S6** Normalized Raman spectra of NMSG undergo different discharge depths.

Fig.S6a) shows the normalized Raman spectra of NMSG undergo different discharge depths. Using electrode in the disassembled cell, we tested the cell for every 0.3V voltage drop during the 2.8V discharge process, the The D and G peaks of graphene stability indicate the structural integrity of the NMSG during electrochemical reduction. Fig.S6b) shows Raman spectra of NMSG and rGO@S. The NMSG sample

presented two main characteristic MXene Raman shifts at the peak of 415 and 625  $\text{cm}^{-1}$ , indicating the presence of MXene in the NMSG.

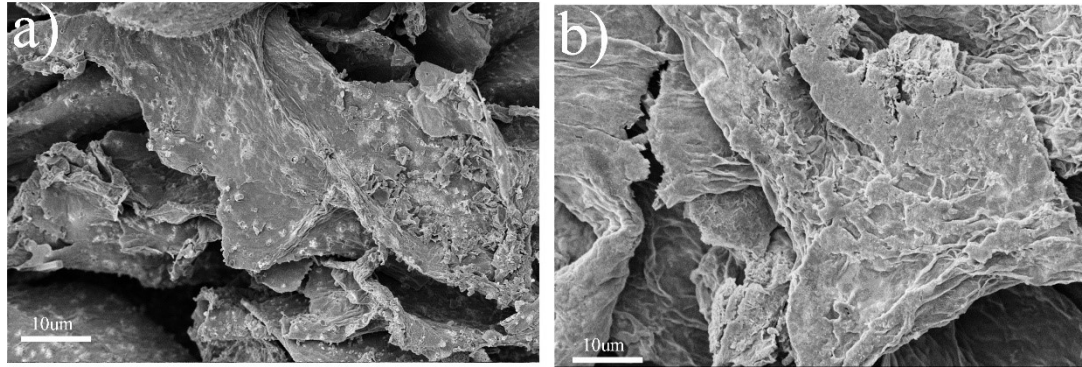

**Fig.S7** SEM images of the NMSG-6 electrode a)before cycling and b)after 100 cycles at 0.2C.

**Table S1.** Comparison of other MXene/S/Graphene ternery hybrids electrode for Li-S battery

|   | Material                                                  | Adsorption Mechanism | Areal sulfur loadng [mg/cm <sup>2</sup> ] | Rate | Fatigue resistance |          |                      | Ref.     |
|---|-----------------------------------------------------------|----------------------|-------------------------------------------|------|--------------------|----------|----------------------|----------|
|   |                                                           |                      |                                           |      | Cycle              | Capacity | Fade ratio per cycle |          |
| 1 | N-Ti <sub>3</sub> C <sub>2</sub> T <sub>x</sub> /S        | Chemical             | 1.5                                       | 0.2C | 200                | 950      | 0.085%               | [1]      |
|   |                                                           |                      | 5.1                                       | 0.2C | 500                | 588      | 0.046%               |          |
| 2 | Ti <sub>3</sub> C <sub>2</sub> T <sub>x</sub> /rGo fibers | Chemical             | 1.4                                       | 0.2C | 100                | 942      | 0.092%               | [2]      |
|   |                                                           |                      | -                                         | -    | -                  | -        | —                    |          |
| 3 | Ti <sub>3</sub> C <sub>2</sub> T <sub>x</sub> /rGo/S      | Chemical             | 1.5                                       | 1C   | 500                | 596      | 0.073%               | [3]      |
|   |                                                           |                      | 6                                         | 0.1C | 30                 | 879      | —                    |          |
| 4 | Ti <sub>3</sub> C <sub>2</sub> T <sub>x</sub> /rGo/S      | Chemical             | 1.5                                       | 0.5C | 300                | 878      | 0.077%               | [4]      |
|   |                                                           |                      | -                                         | -    | -                  | -        | -                    |          |
| 5 | N-Ti <sub>3</sub> C <sub>2</sub> T <sub>x</sub> @S/rGO    | Chemical & Physical  | 1.5                                       | 1C   | 300                | 721      | 0.067%               | Our work |
|   |                                                           |                      | 5.1                                       | 0.2C | 200                | 611      | 0.061%               |          |

## Reference

- [1] Bao W , Liu L , Wang C , et al. Facile Synthesis of Crumpled Nitrogen - Doped MXene Nanosheets as a New Sulfur Host for Lithium - Sulfur Batteries . *Advanced Energy Materials*, 2018, 8(13):1702485.
- [2] Li H , Shao F , Wen X , et al. Graphene/MXene fibers-enveloped sulfur cathodes for high-performance Li-S batteries. *Electrochimica Acta*, 2021:137838.
- [3] Song J , X Guo, Zhang J , et al. Rational design of free-standing 3D porous MXene/rGO hybrid aerogels as polysulfide reservoirs for high-energy lithium-sulfur batteries[J]. *Journal of Materials Chemistry A*, 2019.
- [4] Bao W , Xie X , Xu J , et al. Confine sulfur in 3D flexible hybrid MXene/reduced graphene oxide nanosheets for lithium sulfur battery[J]. *Chemistry*, 2017.
